# Supplementary material for: Pediatric Hospitalizations at Rural and Urban Teaching and Nonteaching Hospitals in the US, 2009-2019
Source: PubMed Central journal article supplement (PMC10474556; doi:10.1001/jamanetworkopen.2023.31807), 2023-09-01
Supplement: jamanetwopen-e2331807-s001.pdf [file jamanetwopen-e2331807-s001.pdf]

## Supplemental Online Content

Leyenaar JK, Freyleue S, Arakelyan M, Goodman D, O'Malley AJ. Pediatric hospitalizations at rural and urban teaching and nonteaching hospitals in the US, 2009-2019. *JAMA Netw Open*. 2023;6(9):e2331807. doi:10.1001/jamanetworkopen.2023.31807

**eTable 1.** Birth and Nonbirth Pediatric Hospitalizations and Total Hospitalization Costs at Rural Hospitals, Urban Nonteaching and Teaching Hospitals, and Freestanding Children's Hospitals, 2009-2019, Weighted National Estimates

**eTable 2.** Payer and Community Median Income Distribution by Year and Hospital Type Among Birth Hospitalizations, Weighted National Estimates, 2009-2019<sup>a</sup>

**eTable 3.** Payer and Community Median Income Distribution by Year and Hospital Type Among Nonbirth Pediatric Hospitalizations, Weighted National Estimates, 2009-2019<sup>a</sup>

**eTable 4.** Age Distribution by Year and Hospital Type Among Nonbirth Pediatric Hospitalizations, Weighted National Estimates, 2009-2019

**eTable 5.** Complicated Birth Hospitalizations and Nonbirth Hospitalizations With Complex Chronic Diseases, Mental Health, and Disability Diagnoses, Weighted National Estimates, 2009-2019

This supplemental material has been provided by the authors to give readers additional information about their work.

**eTable 1. Birth and Nonbirth Pediatric Hospitalizations and Total Hospitalization Costs at Rural Hospitals, Urban Nonteaching and Teaching Hospitals, and Freestanding Children's Hospitals, 2009-2019, Weighted National Estimates.**

|                                                         | <b>2009<sup>a</sup></b><br>N,% of total (95%CI) | <b>2012</b><br>N, % of total (95%CI) | <b>2016</b><br>N, % of total (95%CI) | <b>2019</b><br>N, % of total (95%CI) | <b>Change, 2009-2019</b><br>N (95% CI)                          |
|---------------------------------------------------------|-------------------------------------------------|--------------------------------------|--------------------------------------|--------------------------------------|-----------------------------------------------------------------|
| <b>Birth hospitalizations</b>                           | <b>3,856,059</b>                                | <b>3,736,337</b>                     | <b>3,770,047</b>                     | <b>3,567,900</b>                     | <b>-288,159</b><br><b>(-479,497; -96,821)</b>                   |
| Rural hospitals                                         | 474,038<br>12.3 (11.6-13.0)                     | 447,988,<br>12.0 (11.3-12.6)         | 372,614,<br>9.9 (9.3-10.4)           | 332,835,<br>9.3 (8.8-9.9)            | -141,203<br>(-171,093; -111,313)                                |
| Urban non-teaching hospitals                            | 1,723,546<br>44.7 (42.9-46.5)                   | 1,429,665,<br>38.3 (36.7-39.8)       | 929,780,<br>24.7 (23.3-26.0)         | 617,957,<br>17.3 (16.2-18.5)         | -1,105,589<br>(-1,202,886; -1,008,292)                          |
| Urban teaching hospitals                                | 1,647,202<br>42.7 (40.8-44.6)                   | 1,845,633,<br>49.4 (47.7-51.1)       | 2,447,520,<br>64.9 (63.4-66.4)       | 2,586,803,<br>72.5 (71.1-73.9)       | +939,601<br>(779,872; 1,099,330)                                |
| Freestanding children's hospitals                       | 11,273<br>0.3 (0.0-0.7)                         | 13,051,<br>0.3 (0.0-0.8)             | 20,133,<br>0.5 (0.0-1.1)             | 30,305,<br>0.8 (0.2-1.5)             | +19,032<br>(-8,106; 46,170)                                     |
| <b>Birth hospitalization costs, Millions of USD</b>     | <b>11,600.6</b>                                 | <b>13,401.5</b>                      | <b>15,643.0</b>                      | <b>16,699.7</b>                      | Millions of USD<br><b>+5,099.1</b><br><b>(3,673.1; 6,525.2)</b> |
| Rural hospitals                                         | 636.8<br>5.5 (4.9-6.1)                          | 703.8<br>5.3 (4.6-5.9)               | 637.6<br>4.1 (3.7-4.5)               | 650.6<br>3.9 (3.4-4.4)               | +13.8<br>(-78.7; 106.4)                                         |
| Urban-nonteaching hospitals                             | 3,939.5<br>34.0 (31.9-36.0)                     | 3,534.1<br>26.4 (24.7-28.1)          | 2,268.0<br>14.5 (13.0-16.0)          | 1,637.1<br>9.8 (8.6-11.1)            | -2,302.5<br>(-2,716.3; -1,888.7)                                |
| Urban-Teaching hospitals                                | 6,896.9<br>59.5 (56.8-62.1)                     | 8,852.5<br>66.1 (63.6-68.5)          | 11,932.2<br>76.3 (73.7-78.8)         | 13,551.7<br>81.1 (78.5-83.8)         | +6,654.8<br>(5,416.8; 7,892.9)                                  |
| Freestanding children's hospitals                       | 127.4<br>1.1 (0.0-2.4)                          | 311.1<br>2.3 (0.3-4.3)               | 805.2<br>5.1 (1.7-8.6)               | 860.4<br>5.2 (2.2-8.1)               | +733.0<br>(166.4; 1,299.5)                                      |
| <b>Non-birth hospitalizations</b>                       | <b>2,330,980</b>                                | <b>2,121,093</b>                     | <b>1,832,564</b>                     | <b>1,729,982</b>                     | <b>-600,998</b><br><b>(-811,907; -390,089)</b>                  |
| Rural hospitals                                         | 229,263<br>9.8 (9.0-10.7)                       | 156,428<br>7.4 (6.6-8.1)             | 80,705<br>4.4 (3.9-4.9)              | 62,729<br>3.6 (3.2-4.1)              | -166,534<br>(-182,487; -150,581)                                |
| Urban non-teaching hospitals                            | 581,320<br>24.9 (22.7-27.2)                     | 381,642<br>18.0 (16.2-19.8)          | 177,222<br>9.7 (8.3-11.0)            | 92,118<br>5.3 (4.5-6.1)              | -489,202<br>(-543,358; -435,046)                                |
| Urban teaching hospitals                                | 969,631<br>41.6 (38.4-44.8)                     | 1,017,888<br>48.0 (44.0-51.6)        | 1,001,976<br>54.7 (50.4-58.9)        | 1,002,652<br>58.0 (53.5-62.4)        | +33,021<br>(-98,395; 164,437)                                   |
| Freestanding children's hospitals                       | 550,766<br>23.6 (20.0-27.3)                     | 565,135<br>26.6 (22.4-30.9)          | 572,661<br>31.2 (26.5-36.0)          | 572,483<br>33.1 (28.4-37.8)          | +21,717<br>(-133,283; 176,717)                                  |
| <b>Non-birth hospitalization costs, Millions of USD</b> | <b>23,739.0</b>                                 | <b>26,948.3</b>                      | <b>28,897.6</b>                      | <b>30,782.6</b>                      | Millions of USD<br><b>+7,043.6</b><br><b>(1,939; 12,148.2)</b>  |
| Rural hospitals                                         | 865.1<br>3.6 (3.1-4.2)                          | 747.9<br>2.8 (2.0-3.6)               | 397.8<br>1.4 (1.1-1.6)               | 364.8<br>1.2 (0.9-1.5)               | -500.3<br>(-613.5; -387.0)                                      |
| Urban non-teaching hospitals                            | 3,049.5<br>12.8 (11.1-14.6)                     | 2,097.9<br>7.8 (6.7-8.9)             | 1,020.8<br>3.5 (2.9-4.2)             | 614.5<br>2.0 (1.5-2.5)               | -2,435.0<br>(-2,828.0; -2,042.0)                                |
| Urban teaching hospitals                                | 9,424.7<br>39.7 (35.9-43.5)                     | 10,878.1<br>40.4 (36.5-44.2)         | 11,700.0<br>40.5 (36.5-44.5)         | 12,461.6<br>40.5 (36.5-44.5)         | +3,036.9<br>(819.2; 5,254.7)                                    |
| Freestanding children's hospitals                       | 10,399.7<br>43.8 (38.3-49.4)                    | 13,224.4<br>49.1 (43.4-54.8)         | 15,779.1<br>54.6 (48.5-60.7)         | 17,341.6<br>56.3 (50.3-62.4)         | +6,941.9<br>(2,362.5; 11,521.4)                                 |

<sup>a</sup>Hospital type (and all hospital characteristics) missing for 238,818 (3.7%) of hospitalizations in 2009

**eTable 2. Payer and Community Median Income Distribution by Year and Hospital Type Among Birth Hospitalizations, Weighted National Estimates, 2009-2019<sup>a</sup>**

|                                               | 2009 <sup>d</sup> |                 | 2012             |                 | 2016             |                 | 2019             |                 |
|-----------------------------------------------|-------------------|-----------------|------------------|-----------------|------------------|-----------------|------------------|-----------------|
| Rural Hospitals                               | N                 | %, 95% CI       | N                | %, 95% CI       | N                | %, 95% CI       | N                | %, 95% CI       |
| <b>Primary Payer</b>                          | <b>472,941</b>    |                 | <b>445,664</b>   |                 | <b>371,700</b>   |                 | <b>332,138</b>   |                 |
| Medicaid                                      | 261,588           | 55.3(53.8-56.8) | 242,757          | 54.5(52.9-56.1) | 195,225          | 52.5(50.9-54.1) | 174,727          | 52.6(51.1-54.2) |
| Medicare                                      | 1,759             | 0.4(0-0.7)      | 2,453            | 0.6(0.1-1.0)    | 1,518            | 0.4(0.2-0.7)    | 675              | 0.2(0.1-0.3)    |
| Private insurance                             | 166,703           | 35.2(33.9-36.6) | 158,423          | 35.5(34.2-36.9) | 139,223          | 37.5(36.0-39.0) | 120,435          | 36.3(34.9-37.7) |
| Other                                         | 18,627            | 3.9(3.2-4.7)    | 20,581           | 4.6(3.7-5.6)    | 12,869           | 3.5(2.8-4.2)    | 9,085            | 2.7(2.2-3.3)    |
| Self-pay                                      | 24,264            | 5.1(4.4-5.9)    | 21,450           | 4.8(4.1-5.5)    | 22,865           | 6.2(5.5-6.9)    | 27,216           | 8.2(7.2-9.2)    |
| <b>Median Income at ZIP code<sup>bc</sup></b> | <b>459,509</b>    |                 | <b>435,237</b>   |                 | <b>364,076</b>   |                 | <b>327,040</b>   |                 |
| Quartile 1                                    | 228,758           | 49.8(47.0-52.6) | 224,524          | 51.6(48.9-54.3) | 167,128          | 45.9(43.3-48.5) | 168,490          | 51.5(48.8-54.3) |
| Quartile 2                                    | 166,334           | 36.2(34.0-38.4) | 150,195          | 34.5(32.3-36.7) | 137,993          | 37.9(35.7-40.1) | 110,761          | 33.9(31.6-36.1) |
| Quartile 3                                    | 53,868            | 11.7(10.1-13.3) | 48,758           | 11.2(9.7-12.7)  | 50,653           | 13.9(12.3-15.5) | 40,424           | 12.4(10.7-14.0) |
| Quartile 4                                    | 10,549            | 2.3(1.5-3.1)    | 11,760           | 2.7(1.8-3.6)    | 8,302            | 2.3(1.4-3.1)    | 7,365            | 2.3(1.4-3.1)    |
| <b>Urban Non-Teaching Hospitals</b>           |                   |                 |                  |                 |                  |                 |                  |                 |
| <b>Primary Payer</b>                          | <b>1,722,020</b>  |                 | <b>1,426,877</b> |                 | <b>928,817</b>   |                 | <b>617,617</b>   |                 |
| Medicaid                                      | 744,126           | 43.2(41.5-44.9) | 634,556          | 44.5(42.8-46.1) | 427,400          | 46.0(44.1-47.9) | 266,085          | 43.1(40.9-45.3) |
| Medicare                                      | 1,899             | 0.1(0.1-0.2)    | 5,350            | 0.4(0.2-0.6)    | 3,586            | 0.4(0.2-0.5)    | 3,172            | 0.5(0.3-0.7)    |
| Private insurance                             | 862,057           | 50.1(48.3-51.8) | 677,472          | 47.5(45.8-49.2) | 419,143          | 45.1(43.2-47.1) | 291,856          | 47.3(45.0-49.5) |
| Other                                         | 46,406            | 2.7(2.4-3.0)    | 52,447           | 3.7(3.2-4.2)    | 28,597           | 3.1(2.7-3.5)    | 18,669           | 3.0(2.6-3.5)    |
| Self-pay                                      | 67,532            | 3.9(3.5-4.4)    | 57,052           | 4.0(3.4-4.6)    | 50,091           | 5.4(4.6-6.2)    | 37,835           | 6.1(5.3-7.0)    |
| <b>Median Income at ZIP code<sup>b</sup></b>  | <b>1,698,580</b>  |                 | <b>1,411,176</b> |                 | <b>920,216</b>   |                 | <b>611,558</b>   |                 |
| Quartile 1                                    | 361,424           | 21.3(19.6-23.0) | 310,365          | 22.0(20.3-23.7) | 233,071          | 25.3(23.4-27.3) | 135,450          | 22.1(19.9-24.4) |
| Quartile 2                                    | 434,685           | 25.6(24.3-26.9) | 340,183          | 24.1(22.8-25.4) | 228,754          | 24.9(23.5-26.3) | 158,856          | 26.0(24.1-27.9) |
| Quartile 3                                    | 477,750           | 28.1(26.9-29.4) | 393,042          | 27.9(26.6-29.1) | 246,665          | 26.8(25.4-28.2) | 171,808          | 28.1(26.4-29.8) |
| Quartile 4                                    | 424,721           | 25.0(23.0-27.0) | 367,586          | 26.0(23.9-28.2) | 211,726          | 23.0(20.7-25.3) | 145,444          | 23.8(20.9-26.7) |
| <b>Urban Teaching Hospitals</b>               |                   |                 |                  |                 |                  |                 |                  |                 |
| <b>Primary Payer</b>                          | <b>1,644,144</b>  |                 | <b>1,840,555</b> |                 | <b>2,445,003</b> |                 | <b>2,583,107</b> |                 |
| Medicaid                                      | 730,221           | 44.4(41.9-46.9) | 844,499          | 45.9(43.8-47.9) | 1,084,288        | 44.3(42.7-46.0) | 1,130,471        | 43.8(42.3-45.2) |
| Medicare                                      | 1,647             | 0.1(0.0-0.2)    | 5,467            | 0.3(0.2-0.4)    | 8,644            | 0.4(0.2-0.5)    | 5,324            | 0.2(0.1-0.3)    |
| Private insurance                             | 801,147           | 48.7(46.1-51.4) | 878,556          | 47.7(45.6-49.8) | 1,186,694        | 48.5(46.9-50.2) | 1,253,935        | 48.5(47-50.1)   |
| Other                                         | 36,688            | 2.2(1.8-2.7)    | 45,862           | 2.5(2.1-2.8)    | 65,743           | 2.7(2.3-3.0)    | 66,780           | 2.6(2.3-2.9)    |
| Self-pay                                      | 74,441            | 4.5(3.8-5.3)    | 66,171           | 3.6(3.1-4.1)    | 99,634           | 4.1(3.7-4.5)    | 126,597          | 4.9(4.4-5.4)    |

|                                               | 2009             |                 | 2012             |                 | 2016             |                 | 2019             |                 |
|-----------------------------------------------|------------------|-----------------|------------------|-----------------|------------------|-----------------|------------------|-----------------|
|                                               | N                | %, 95% CI       | N                | %, 95% CI       | N                | %, 95% CI       | N                | %, 95% CI       |
| <b>Median Income at ZIP code</b> <sup>b</sup> | <b>1,611,398</b> |                 | <b>1,811,661</b> |                 | <b>2,426,960</b> |                 | <b>2,568,208</b> |                 |
| Quartile 1                                    | 451,010          | 28(25.8-30.2)   | 505,675          | 27.9(26.0-29.8) | 657,658          | 27.1(25.6-28.6) | 677,060          | 26.4(24.9-27.8) |
| Quartile 2                                    | 386,508          | 24(22.7-25.3)   | 410,097          | 22.6(21.5-23.8) | 544,524          | 22.4(21.4-23.4) | 588,211          | 22.9(21.9-23.9) |
| Quartile 3                                    | 402,554          | 25(23.7-26.2)   | 459,873          | 25.4(24.3-26.5) | 626,354          | 25.8(24.9-26.7) | 675,376          | 26.3(25.4-27.2) |
| Quartile 4                                    | 371,326          | 23(20.8-25.3)   | 436,016          | 24.1(22.0-26.1) | 598,424          | 24.7(22.9-26.4) | 627,561          | 24.4(22.8-26.1) |
| <b>Freestanding Children's Hospital</b>       |                  |                 |                  |                 |                  |                 |                  |                 |
| <b>Primary Payer</b>                          | <b>11,273</b>    |                 | <b>13,051</b>    |                 | <b>20,134</b>    |                 | <b>30,305</b>    |                 |
| Medicaid/Medicare                             | 5,346            | 47.4(45.3-49.5) | 6,129            | 47.0(41.1-52.9) | 9,707            | 48.2(33.7-62.7) | 13,962           | 46.1(39.6-52.5) |
| Private Insurance                             | 5,472            | 48.5(43.1-54.0) | 6,227            | 47.7(40.9-54.5) | 9,056            | 45.0(35.4-54.6) | 14,299           | 47.2(41.0-53.3) |
| Other                                         | 325              | 2.9(0.1-5.7)    | 414              | 3.2(2.5-3.9)    | 1,072            | 5.3(0.1-10.5)   | 1,052            | 3.5(1.2-5.7)    |
| Self-pay                                      | 130              | 1.2(0.0-2.4)    | 281              | 2.2(0.3-4.0)    | 299              | 1.5(0.2-2.8)    | 992              | 3.3(1.5-5.0)    |
| <b>Median Income at ZIP code</b> <sup>b</sup> | <b>11,194</b>    |                 | <b>12,915</b>    |                 | <b>20,011</b>    |                 | <b>30,083</b>    |                 |
| Quartile 1                                    | 2,426            | 21.7(0.0-46.4)  | 2,038            | 15.8(0.0-32.6)  | 3,455            | 17.3(7.1-27.4)  | 5,559            | 18.5(7.2-29.8)  |
| Quartile 2                                    | 1,463            | 13.1(0.0-27.0)  | 2,731            | 21.1(0.0-42.3)  | 5,560            | 27.8(6.5-49.1)  | 6,069            | 20.2(7.3-33.1)  |
| Quartile 3                                    | 2,148            | 19.2(17.7-20.7) | 1,951            | 15.1(12.1-18.1) | 3,678            | 18.4(13.1-23.7) | 7,830            | 26.0(17.8-34.3) |
| Quartile 4                                    | 5,157            | 46.1(6.2-85.9)  | 6,195            | 48.0(7.2-88.7)  | 7,318            | 36.6(5.8-67.4)  | 10,625           | 35.3(16.5-54.2) |

<sup>a</sup> Bolded numbers show weighted national estimates of non-missing data; variables with  $\geq 3.0\%$  missing data are also indicated with footnotes;

<sup>b</sup> Quartile ranges for median household income at home ZIP Code vary annually (e.g. Quartile 1 encompasses median household incomes of <\$40,000 in 2009 and <\$48,000 in 2019.) Details available in the HCUP data dictionaries.

<sup>c</sup> n, % of hospitalizations with missing values in 2019 - 14,529 (3.0%)

<sup>d</sup> Hospital type missing for 238,818 (3.7%) of hospitalizations in 2009

**eTable 3. Payer and Community Median Income Distribution by Year and Hospital Type Among Nonbirth Pediatric Hospitalizations, Weighted National Estimates, 2009-2019<sup>a</sup>**

|                                               | 2009 <sup>d</sup> |                 | 2012             |                 | 2016             |                 | 2019             |                 |
|-----------------------------------------------|-------------------|-----------------|------------------|-----------------|------------------|-----------------|------------------|-----------------|
|                                               | N                 | %, 95% CI       | N                | %, 95% CI       | N                | %, 95% CI       | N                | %, 95% CI       |
| <b>Rural Hospitals</b>                        |                   |                 |                  |                 |                  |                 |                  |                 |
| <b>Primary Payer</b>                          | <b>228,576</b>    |                 | <b>155,380</b>   |                 | <b>80,252</b>    |                 | <b>62,488</b>    |                 |
| Medicaid                                      | 133,437           | 58.4(56.9-59.9) | 91,660           | 59.0(57.3-60.7) | 47,766           | 59.5(57.4-61.6) | 38,517           | 61.6(59.9-63.3) |
| Medicare                                      | 1,221             | 0.5(0.0-1.2)    | 967              | 0.6(0.2-1.0)    | 408              | 0.5(0.2-0.9)    | 233              | 0.4(0.1-0.6)    |
| Private insurance                             | 78,140            | 34.2(32.8-35.6) | 52,032           | 33.5(31.9-35.1) | 26,960           | 33.6(31.4-35.8) | 19,684           | 31.5(29.8-33.2) |
| Other                                         | 8,147             | 3.6(3.1-4.1)    | 6,009            | 3.9(3.1-4.7)    | 2,613            | 3.3(2.5-4.0)    | 1,713            | 2.7(2.0-3.5)    |
| Self-pay                                      | 7,631             | 3.3(3.1-3.6)    | 4,712            | 3.0(2.8-3.3)    | 2,505            | 3.1(2.8-3.4)    | 2,341            | 3.7(3.4-4.1)    |
| <b>Median Income at ZIP code<sup>bc</sup></b> | <b>221,172</b>    |                 | <b>151,517</b>   |                 | <b>78,490</b>    |                 | <b>61,211</b>    |                 |
| Quartile 1                                    | 130,793           | 59.1(56.3-62.0) | 91,451           | 60.4(57.4-63.3) | 40,639           | 51.8(48.3-55.3) | 32,382           | 52.9(48.8-57.0) |
| Quartile 2                                    | 67,555            | 30.5(28.4-32.7) | 44,598           | 29.4(27.0-31.8) | 26,194           | 33.4(30.6-36.2) | 19,812           | 32.4(29.3-35.4) |
| Quartile 3                                    | 18,534            | 8.4(7.1-9.7)    | 12,693           | 8.4(7.1-9.7)    | 9,747            | 12.4(10.6-14.2) | 7,458            | 12.2(10.1-14.2) |
| Quartile 4                                    | 4,290             | 1.9(1.3-2.6)    | 2,775            | 1.8(1.3-2.3)    | 1,910            | 2.4(1.6-3.2)    | 1,559            | 2.5(1.6-3.5)    |
| <b>Urban Non-Teaching Hospitals</b>           |                   |                 |                  |                 |                  |                 |                  |                 |
| <b>Primary Payer</b>                          | <b>580,624</b>    |                 | <b>380,822</b>   |                 | <b>177,135</b>   |                 | <b>92,062</b>    |                 |
| Medicaid                                      | 291,733           | 50.2(48.4-52.1) | 202,491          | 53.2(51.3-55.0) | 101,111          | 57.1(54.5-59.7) | 52,011           | 56.5(53.5-59.5) |
| Medicare                                      | 845               | 0.1(0.1-0.2)    | 896              | 0.2(0.1-0.4)    | 634              | 0.4(0.1-0.6)    | 568              | 0.6(0.2-1.0)    |
| Private insurance                             | 246,417           | 42.4(40.6-44.3) | 149,234          | 39.2(37.2-41.2) | 64,298           | 36.3(33.4-39.2) | 32,556           | 35.4(32.6-38.1) |
| Other                                         | 21,895            | 3.8(3.3-4.2)    | 17,330           | 4.6(3.9-5.2)    | 5,990            | 3.4(2.7-4.1)    | 3,346            | 3.6(3.0-4.2)    |
| Self-pay                                      | 19,734            | 3.4(3.1-3.7)    | 10,871           | 2.9(2.6-3.1)    | 5,102            | 2.9(2.5-3.2)    | 3,581            | 3.9(3.2-4.6)    |
| <b>Median Income at ZIP code<sup>b</sup></b>  | <b>570,325</b>    |                 | <b>375,728</b>   |                 | <b>174,933</b>   |                 | <b>91,047</b>    |                 |
| Quartile 1                                    | 159,787           | 28.0(25.3-30.7) | 112,569          | 30.0(26.8-33.1) | 58,468           | 33.4(29.5-37.4) | 27,684           | 30.4(26.2-34.6) |
| Quartile 2                                    | 153,614           | 26.9(25.5-28.4) | 96,461           | 25.7(24.0-27.3) | 44,530           | 25.5(23.5-27.4) | 24,903           | 27.4(24.7-30.0) |
| Quartile 3                                    | 143,315           | 25.1(23.5-26.7) | 89,690           | 23.9(22.3-25.4) | 40,904           | 23.4(21.4-25.3) | 22,460           | 24.7(22.3-27.0) |
| Quartile 4                                    | 113,609           | 19.9(17.8-22.0) | 77,008           | 20.5(18.0-23.0) | 31,031           | 17.7(15.0-20.5) | 16,000           | 17.6(13.9-21.3) |
| <b>Urban Teaching Hospitals</b>               |                   |                 |                  |                 |                  |                 |                  |                 |
| <b>Primary Payer</b>                          | <b>968,324</b>    |                 | <b>1,015,210</b> |                 | <b>1,001,060</b> |                 | <b>1,001,448</b> |                 |
| Medicaid                                      | 474,462           | 49.0(47.2-50.8) | 538,405          | 53.0(51.3-54.7) | 554,190          | 55.4(53.9-56.8) | 548,851          | 54.8(53.2-56.4) |
| Medicare                                      | 2,878             | 0.3(0.2-0.4)    | 4,256            | 0.4(0.2-0.6)    | 3,992            | 0.4(0.2-0.6)    | 2,807            | 0.3(0.2-0.4)    |
| Private insurance                             | 418,095           | 43.2(41.2-45.1) | 402,345          | 39.6(37.8-41.5) | 381,247          | 38.1(36.6-39.5) | 384,579          | 38.4(36.8-40.0) |
| Other                                         | 35,420            | 3.7(3.1-4.2)    | 44,385           | 4.4(3.4-5.3)    | 38,126           | 3.8(3.2-4.4)    | 35,924           | 3.6(3.1-4.1)    |
| Self-pay                                      | 37,469            | 3.9(3.2-4.6)    | 25,819           | 2.5(2.3-2.8)    | 23,505           | 2.3(2.2-2.5)    | 29,287           | 2.9(2.7-3.2)    |

|                                               | 2009           |                 | 2012           |                 | 2016           |                 | 2019           |                 |
|-----------------------------------------------|----------------|-----------------|----------------|-----------------|----------------|-----------------|----------------|-----------------|
|                                               | N              | %, 95% CI       | N              | %, 95% CI       | N              | %, 95% CI       | N              | %, 95% CI       |
| <b>Median Income at ZIP code</b> <sup>b</sup> | <b>940,963</b> |                 | <b>990,372</b> |                 | <b>989,088</b> |                 | <b>991,987</b> |                 |
| Quartile 1                                    | 296,826        | 31.5(29.0-34.0) | 313,717        | 31.7(29.5-33.9) | 323,690        | 32.7(30.6-34.8) | 321,206        | 32.4(30.2-34.6) |
| Quartile 2                                    | 236,832        | 25.2(23.8-26.5) | 243,771        | 24.6(23.3-25.9) | 240,014        | 24.3(23.1-25.4) | 246,543        | 24.9(23.6-26.1) |
| Quartile 3                                    | 214,489        | 22.8(21.6-24.0) | 232,093        | 23.4(22.4-24.5) | 232,217        | 23.5(22.5-24.5) | 237,278        | 23.9(22.9-24.9) |
| Quartile 4                                    | 192,816        | 20.5(18.2-22.8) | 200,791        | 20.3(18.2-22.4) | 193,167        | 19.5(17.5-21.5) | 186,960        | 18.8(16.9-20.8) |
| <b>Freestanding Children's Hospital</b>       |                |                 |                |                 |                |                 |                |                 |
| <b>Primary Payer</b>                          | <b>549,917</b> |                 | <b>564,916</b> |                 | <b>571,131</b> |                 | <b>571,421</b> |                 |
| Medicare/Medicaid                             | 265,747        | 48.3(44.0-52.6) | 288,612        | 51.1(47.2-55.0) | 297,742        | 52.1(47.8-56.5) | 308,675        | 54.0(50.3-57.7) |
| Private insurance                             | 241,883        | 44.0(39.8-48.2) | 228,876        | 40.5(37.2-43.9) | 232,275        | 40.7(36.9-44.4) | 221,761        | 38.8(35.9-41.7) |
| Other                                         | 28,478         | 5.2(3.0-7.4)    | 30,031         | 5.3(3.0-7.6)    | 26,284         | 4.6(2.3-6.9)    | 24,831         | 4.3(2.1-6.5)    |
| Self-pay                                      | 13,809         | 2.5(1.7-3.4)    | 17,397         | 3.1(1.8-4.3)    | 14,830         | 2.6(1.9-3.3)    | 16,154         | 2.8(2.2-3.5)    |
| <b>Median Income at ZIP code</b> <sup>b</sup> | <b>542,291</b> |                 | <b>556,698</b> |                 | <b>563,243</b> |                 | <b>564,507</b> |                 |
| Quartile 1                                    | 159,109        | 29.3(24.6-34.1) | 167,037        | 30.0(25.4-34.6) | 161,618        | 28.7(24.4-33.0) | 159,259        | 28.2(23.9-32.5) |
| Quartile 2                                    | 128,552        | 23.7(21.5-26.0) | 127,719        | 22.9(20.9-25.0) | 132,249        | 23.5(21.1-25.9) | 129,419        | 22.9(20.6-25.2) |
| Quartile 3                                    | 133,747        | 24.7(22.0-27.3) | 137,334        | 24.7(22.2-27.2) | 138,767        | 24.6(22.6-26.6) | 144,676        | 25.6(23.4-27.9) |
| Quartile 4                                    | 120,883        | 22.3(18.1-26.4) | 124,608        | 22.4(18.5-26.3) | 130,609        | 23.2(19.1-27.3) | 131,153        | 23.2(19.3-27.1) |

<sup>a</sup> Bolded numbers show weighted national estimates of non-missing data; variables with  $\geq 3.0\%$  missing data are also indicated with footnotes

<sup>b</sup> Quartile ranges for median household income at home ZIP Code vary annually (e.g. Quartile 1 encompasses median household incomes of  $< \$40,000$  in 2009 and  $< \$48,000$  in 2019.) Details available in the HCUP data dictionaries.

<sup>c</sup> N, % of hospitalizations with missing values: 2009: 8,091 (3.5%) 2012: 4,911 (3.1%)

<sup>d</sup> Hospital type missing for 238,818 (3.7%) of hospitalizations in 2009

**eTable 4. Age Distribution by Year and Hospital Type Among Nonbirth Pediatric Hospitalizations, Weighted National Estimates, 2009-2019.**

|                                          | 2009 <sup>a</sup> |                  | 2012             |                  | 2016             |                  | 2019             |                  |
|------------------------------------------|-------------------|------------------|------------------|------------------|------------------|------------------|------------------|------------------|
|                                          | N                 | %                | N                | %                | N                | %                | N                | %                |
| <b>Rural hospitals</b>                   | <b>228,714</b>    |                  | <b>156,167</b>   |                  | <b>80,705</b>    |                  | <b>62,729</b>    |                  |
| Infant (up to 1 yr)                      | 55,673            | 24.3 (23.7-25.0) | 39,280           | 25.2 (24.3-26.0) | 22,995           | 28.5 (27.0-30.0) | 19,288           | 30.7 (28.6-32.9) |
| Early Childhood (1-4 yrs)                | 62,842            | 27.5 (26.7-28.2) | 39,115           | 25.0 (24.2-25.9) | 17,070           | 21.2 (20.0-22.3) | 12,193           | 19.4 (18.2-20.7) |
| Middle Childhood (5-10 yrs)              | 35,828            | 15.7 (15.3-16.0) | 24,374           | 15.6 (15.1-16.1) | 10,949           | 13.6 (13.0-14.2) | 7,537            | 12.0 (11.3-12.7) |
| Early Adolescence (11-14 yrs)            | 23,889            | 10.4 (10.0-10.9) | 17,747           | 11.4 (10.7-12.0) | 9,146            | 11.3 (10.3-12.4) | 7,741            | 12.3 (10.9-13.8) |
| Later Adolescence (15-17 yrs)            | 50,483            | 22.1 (21.2-23.0) | 35,651           | 22.8 (21.8-23.8) | 20,545           | 25.5 (24.0-26.9) | 15,969           | 25.5 (23.7-27.3) |
| <b>Urban non-teaching hospitals</b>      | <b>572,723</b>    |                  | <b>378,216</b>   |                  | <b>177,222</b>   |                  | <b>92,118</b>    |                  |
| Infant (up to 1 yr)                      | 153,757           | 26.8 (24.3-29.4) | 96,529           | 25.5 (24.5-26.5) | 47,350           | 26.7 (25.1-28.4) | 27,572           | 29.9 (27.5-32.4) |
| Early Childhood (1-4 yrs)                | 123,457           | 21.6 (20.4-22.7) | 75,460           | 20.0 (19.1-20.8) | 29,791           | 16.8 (15.4-18.2) | 14,933           | 16.2 (14.5-17.9) |
| Middle Childhood (5-10 yrs)              | 82,516            | 14.4 (13.7-15.1) | 55,006           | 14.5 (14.0-15.1) | 24,395           | 13.8 (12.8-14.8) | 10,827           | 11.8 (10.7-12.8) |
| Early Adolescence (11-14 yrs)            | 64,807            | 11.3 (10.7-12.0) | 49,949           | 13.2 (12.4-14.0) | 25,478           | 14.4 (13.0-15.8) | 13,464           | 14.6 (12.7-16.6) |
| Later Adolescence (15-17 yrs)            | 148,187           | 25.9 (24.3-27.5) | 101,272          | 26.8 (25.4-28.1) | 50,208           | 28.3 (26.2-30.5) | 25,322           | 27.5 (25.1-29.9) |
| <b>Urban teaching hospitals</b>          | <b>960,824</b>    |                  | <b>1,013,348</b> |                  | <b>1,001,976</b> |                  | <b>1,002,652</b> |                  |
| Infant (up to 1 yr)                      | 230,827           | 24.0 (23.3-24.7) | 244,279          | 24.1 (23.5-24.7) | 256,193          | 25.6 (24.6-26.5) | 256,777          | 25.6 (24.8-26.4) |
| Early Childhood (1-4 yrs)                | 213,427           | 22.2 (21.6-22.8) | 227,148          | 22.4 (21.8-23.0) | 205,596          | 20.5 (19.9-21.2) | 207,159          | 20.7 (19.9-21.4) |
| Middle Childhood (5-10 yrs)              | 167,084           | 17.4 (17.0-17.8) | 178,958          | 17.7 (17.3-18.1) | 172,318          | 17.2 (16.7-17.7) | 161,760          | 16.1 (15.7-16.6) |
| Early Adolescence (11-14 yrs)            | 133,960           | 13.9 (13.5-14.3) | 150,992          | 14.9 (14.5-15.3) | 152,511          | 15.2 (14.7-15.7) | 164,959          | 16.5 (15.9-17.0) |
| Later Adolescence (15-17 yrs)            | 215,526           | 22.4 (21.4-23.5) | 211,971          | 20.9 (20.0-21.8) | 215,358          | 21.5 (20.7-22.3) | 211,997          | 21.1 (20.3-22.0) |
| <b>Freestanding children's hospitals</b> | <b>547,871</b>    |                  | <b>564,376</b>   |                  | <b>572,661</b>   |                  | <b>572,483</b>   |                  |
| Infant (up to 1 yr)                      | 153,545           | 28.0 (26.6-29.4) | 152,509          | 27.0 (25.5-28.6) | 154,449          | 27.0 (25.1-28.8) | 153,059          | 26.7 (25.1-28.4) |
| Early Childhood (1-4 yrs)                | 139,604           | 25.5 (24.8-26.2) | 139,923          | 24.8 (24.1-25.5) | 134,491          | 23.5 (22.7-24.3) | 137,729          | 24.1 (23.3-24.8) |
| Middle Childhood (5-10 yrs)              | 110,327           | 20.1 (19.6-20.7) | 115,845          | 20.5 (19.9-21.1) | 116,966          | 20.4 (19.7-21.2) | 108,995          | 19.0 (18.4-19.7) |
| Early Adolescence (11-14 yrs)            | 81,311            | 14.8 (14.2-15.5) | 87,365           | 15.5 (14.7-16.2) | 90,729           | 15.8 (15.1-16.6) | 93,789           | 16.4 (15.7-17.1) |
| Later Adolescence (15-17 yrs)            | 63,085            | 11.5 (10.7-12.3) | 68,734           | 12.2 (11.4-12.9) | 76,026           | 13.3 (12.5-14.1) | 78,911           | 13.8 (13.1-14.5) |

<sup>a</sup> Hospital type missing for 238,818 (3.7%) of hospitalizations in 2009

**eTable 5. Complicated Birth Hospitalizations and Nonbirth Hospitalizations With Complex Chronic Diseases, Mental Health, and Disability Diagnoses, Weighted National Estimates, 2009-2019**

|                                                                        | <b>2009<sup>a</sup></b><br>Birth<br>hospitalizations=3,856,059<br>Non-births=2,330,981 | <b>2012</b><br>Birth<br>hospitalizations=3,736,338<br>Non-births=2,121,092 | <b>2016</b><br>Birth<br>hospitalizations=3,770,047<br>Non-births=1,832,565 | <b>2019</b><br>Birth<br>hospitalizations=3,567,900<br>Non-births=1,729,982 | <b>Relative % Change,<br/>2009-2019</b> |
|------------------------------------------------------------------------|----------------------------------------------------------------------------------------|----------------------------------------------------------------------------|----------------------------------------------------------------------------|----------------------------------------------------------------------------|-----------------------------------------|
| <b>Complicated births,<sup>b</sup> n,<br/>% (95%CI)</b>                | 1,133,458<br>29.4% (28.8-29.9%)                                                        | 1,115,917<br>29.9% (29.3-30.4%)                                            | 1,404,581<br>37.3% (36.6-37.9%)                                            | 1,497,243<br>42.0% (41.3-42.6%)                                            | +42.8%<br>(39.1; 46.5%)                 |
| Rural hospitals                                                        | 119,132<br>25.1% (24.3-26.0%)                                                          | 114,183<br>25.5% (24.7-26.3%)                                              | 116,267<br>31.2% (30.1-32.3%)                                              | 116,893<br>35.1% (34.0-36.2%)                                              | +39.7%<br>(32.7; 46.8%)                 |
| Urban non-teaching hospitals                                           | 473,013<br>27.4% (26.8-28.1%)                                                          | 383,620<br>26.8% (26.2-27.5%)                                              | 306,781<br>33.0% (32.1-33.9%)                                              | 231,697<br>37.5% (36.4-38.6%)                                              | +36.6%<br>(30.6; 42.7%)                 |
| Urban teaching hospitals                                               | 536,676<br>32.6% (31.6-33.6%)                                                          | 612,060<br>33.2% (32.3-34.1%)                                              | 969,733<br>39.6% (38.8-40.5%)                                              | 1,131,662<br>43.7% (42.9-44.6%)                                            | +34.3%<br>(29.6; 39%)                   |
| Freestanding children's hospitals                                      | 4,636<br>41.1% (18.9-63.4%)                                                            | 6,055<br>46.4% (23.0-69.8%)                                                | 11,801<br>58.6% (44.3-72.9%)                                               | 16,992<br>56.1% (51.9-60.2%)                                               | +36.3%<br>(-19.4; 92.1%)                |
| <b>Complex Chronic Disease<br/>Diagnosis,<sup>c</sup> n, % (95%CI)</b> | 483,516<br>20.7% (19.6-21.9%)                                                          | 519,672<br>24.5% (23.3-25.7%)                                              | 519,567<br>28.4% (27.0-29.7%)                                              | 522,168<br>30.2% (28.8-31.5%)                                              | +45.5%<br>(34.6; 56.4%)                 |
| Rural hospitals                                                        | 16,306<br>7.1% (6.0-8.2%)                                                              | 12,832<br>8.2% (6.8-9.7%)                                                  | 6,684<br>8.3% (7.2-9.4%)                                                   | 6,258<br>10.0% (8.1-11.9%)                                                 | +40.3%<br>(-0.5; 81%)                   |
| Urban non-teaching hospitals                                           | 54,507<br>9.4% (8.3-10.5%)                                                             | 39,062<br>10.2% (9.2-11.3%)                                                | 19,847<br>11.2% (9.8-12.6%)                                                | 9,910<br>10.8% (9.3-12.2%)                                                 | +14.7%<br>(-6.6; 36.1%)                 |
| Urban teaching hospitals                                               | 224,413<br>23.1% (21.5-24.8%)                                                          | 258,887, 25.4%(24.0-<br>26.9%)                                             | 265,044<br>26.5% (25.1-27.8%)                                              | 272,922<br>27.2% (25.8-28.7%)                                              | +17.6%<br>(7.4; 27.8%)                  |
| Freestanding children's hospitals                                      | 188,290<br>34.2% (32.1-36.3%)                                                          | 208,892<br>37.0% (34.8-39.2%)                                              | 227,992<br>39.8% (37.5-42.1%)                                              | 233,078<br>40.7% (38.4-43.0%)                                              | +19.1%<br>(9.1; 29.1%)                  |
| <b>Mental Health Diagnosis,<sup>c</sup> n,<br/>% (95%CI)</b>           | 325,975<br>14.0% (13.2-14.8%)                                                          | 376,335<br>17.7% (16.8-18.7%)                                              | 399,902<br>21.8% (20.7-22.9%)                                              | 430,657<br>24.9% (23.7-26.1%)                                              | +78.0%<br>(61.6; 94.4%)                 |
| Rural hospitals                                                        | 21,270<br>9.3% (8.1-10.4%)                                                             | 18,406<br>11.8% (10.0-13.5%)                                               | 13,181<br>16.3% (13.4-19.3%)                                               | 12,632<br>20.1% (16.3-23.9%)                                               | +117.1%<br>(27.5; 206.6%)               |
| Urban non-teaching hospitals                                           | 75,325<br>13.0% (11.2-14.7%)                                                           | 68,481<br>17.9% (15.4-20.5%)                                               | 41,739<br>23.6% (19.2-27.9%)                                               | 23,441<br>25.4% (20.0-30.9%)                                               | +96.4%<br>(13.2; 179.6%)                |
| Urban teaching hospitals                                               | 164,823<br>17.0% (15.7-18.3%)                                                          | 201,711<br>19.8% (18.5-21.1%)                                              | 232,216<br>23.2% (21.7-24.7%)                                              | 268,763<br>26.8% (25.1-28.5%)                                              | +57.7%<br>(40.3; 75.1%)                 |
| Freestanding children's hospitals                                      | 64,558<br>11.7% (10.1-13.4%)                                                           | 87,738<br>15.5% (13.7-17.4%)                                               | 112,767<br>19.7% (17.7-21.7%)                                              | 125,820<br>22.0% (20.1-23.9%)                                              | +87.5%<br>(53.9; 121.1%)                |
| <b>Disability Diagnosis,<sup>c</sup> n,<br/>% (95%CI)</b>              | 249,089<br>10.7% (10.1-11.3%)                                                          | 272,564<br>12.9% (12.2-13.5%)                                              | 308,908<br>16.9% (16.1-17.6%)                                              | 329,284<br>19.0% (18.2-19.9%)                                              | +78.1%<br>(63.1; 93.2%)                 |
| Rural hospitals                                                        | 8,010<br>3.5%(2.9-4.1%)                                                                | 6,392<br>4.1% (3.3-4.8%)                                                   | 4,271<br>5.3% (4.5-6.1%)                                                   | 4,128<br>6.6% (5.2-8.0%)                                                   | +88.3%<br>(12.7; 164%)                  |
| Urban non-teaching hospitals                                           | 28,386<br>4.9% (4.4-5.4%)                                                              | 21,586<br>5.7% (5.1-6.2%)                                                  | 12,892<br>7.3% (6.4-8.1%)                                                  | 6,653<br>7.2% (6.4-8.0%)                                                   | +47.9%<br>(21.1; 74.7%)                 |
| Urban teaching hospitals                                               | 113,885<br>11.7% (10.9-12.6%)                                                          | 133,733<br>13.1% (12.3-13.9%)                                              | 155,646<br>15.5% (14.7-16.4%)                                              | 172,820<br>17.2% (16.3-18.2%)                                              | +46.8%<br>(33.1; 60.4%)                 |
| Freestanding children's hospitals                                      | 98,808<br>17.9% (16.6-19.3%)                                                           | 110,852<br>19.6% (18.3-20.9%)                                              | 136,099<br>23.8% (22.4-25.1%)                                              | 145,684<br>25.4% (24.1-26.8%)                                              | +41.8%<br>(28.6; 55.1%)                 |

<sup>a</sup> Hospital type missing for 238,818 (3.7%) of hospitalizations in 2009, <sup>b</sup> denominator reflects all birth hospitalizations, <sup>c</sup> denominator reflects all non-birth hospitalizations
