# Supplementary material for: Pediatric Hospitalizations at Rural and Urban Teaching and Nonteaching Hospitals in the US, 2009-2019
Source: PubMed Central journal article supplement (PMC10474556; doi:10.1001/jamanetworkopen.2023.31807), 2023-09-01
Supplement: jamanetwopen-e2331807-s002.pdf [file jamanetwopen-e2331807-s002.pdf]

## Data Sharing Statement

Leyenaar. Pediatric Hospitalizations at Rural and Urban Teaching and Nonteaching Hospitals in the US, 2009-2019. *JAMA Netw Open*. Published September 01, 2023.

doi:10.1001/jamanetworkopen.2023.31807

### Data

**Data available:** No

### Additional Information

**Explanation for why data not available:** Our data use agreement prohibits data sharing.
